# Supplementary material
Source: publisher site journal article supplement (https://www.dovepress.com/get_supplementary_file.php?f=234241-S3.docx)
Supplement: Supplementary file 1 [file get_supplementary_file.php]

Table S3. COX proportional hazards model of variables in original forms, N=1438.

|  | HR | 95%CI | P Value |
| --- | --- | --- | --- |
| BMI | 0.98 | (0.96, 0.99) | 0.0081 |
| History of asthma | 1.46 | (1.19, 1.78) | 0.0002 |
| History of diabetes | 1.48 | (1.15, 1.90) | 0.0024 |
| History of GERD | 1.20 | (0.99, 1.46) | 0.0688 |
| History of congestive heart failure | 2.07 | (1.32, 3.25) | 0.0015 |
| CAT | 1.05 | (1.03, 1.06) | 0.0000 |
| Severe exacerbations history | 1.12 | (1.10, 1.30) | 0.0000 |
| Post-bronchodilator FEV1(% predicted) | 0.98 | (0.98, 0.99) | 0.0000 |
| Total white cells | 1.05 | (1.01, 1.08) | 0.0103 |
